# Supplementary material
Source: ML conference proceedings conference paper supplement (https://proceedings.mlr.press/v139/jiang21f.html)
Supplement: Supplementary file [file jiang21f-supp.pdf]

## A. Omitted Proofs of Useful Inequalities

### A.1. Proof of Proposition 2

*Proof.* Let  $h(x) = (1 + 2x) \ln(1 + x) - x$ . Since  $h(0) = 0$ , it suffices to show that  $h'(x) > 0$ . We calculate that

$$h'(x) = \frac{x}{1+x} + 2 \ln(1+x).$$

Since  $h'(0) = 0$ , it suffices to show that  $h''(x) > 0$ . This can be readily verified by calculating that

$$h''(x) = \frac{3+2x}{(1+x)^2} > 0. \quad \square$$

### A.2. Proof of Proposition 4

*Proof.* Let  $f(x, y) = \ln^2(1+x) + \ln^2(1+y) - \ln^2(1 + \sqrt{x^2 + y^2})$ . It suffices to show that  $f(x, y) \geq 0$ . The inequality is clearly true when  $x = 0$  or  $y = 0$ . Note that

$$\begin{aligned} \frac{\partial f}{\partial x} &= 2 \left( \frac{\log(1+x)}{1+x} - \frac{x \ln(1 + \sqrt{x^2 + y^2})}{x^2 + y^2 + \sqrt{x^2 + y^2}} \right) \\ \frac{\partial f}{\partial y} &= 2 \left( \frac{\log(1+y)}{1+y} - \frac{y \ln(1 + \sqrt{x^2 + y^2})}{x^2 + y^2 + \sqrt{x^2 + y^2}} \right) \end{aligned}$$

Assuming  $x, y > 0$ ,  $\partial f / \partial x = \partial f / \partial y = 0$  implies that

$$\frac{\log(1+x)}{x(1+x)} = \frac{\log(1+y)}{y(1+y)}.$$

It is easy to verify that  $\log(1+x)/(x(1+x))$  is decreasing w.r.t.  $x$  (checking the derivative and using Proposition 4), so we must have  $x = y$ . Now, let

$$h(x) = \frac{\partial f}{\partial x}(x, x) = \frac{2 \ln(1+x)}{1+x} - \frac{\sqrt{2} \ln(1 + \sqrt{2}x)}{1 + \sqrt{2}x}.$$

We shall show that  $h(x) > 0$  for all  $x > 0$ . This will imply that  $f(x, y)$  has no local minimum or maximum when  $x, y > 0$  and so it is easy to see that  $f(x, y)$  attains the minimum at its boundary  $x = 0$  or  $y = 0$ , yielding that  $f(x, y) \geq 0$  for all  $x, y \geq 0$ .

To see that  $h(x) > 0$ , let

$$g(a) = \frac{\ln(1+ax)}{a(1+ax)}.$$

We calculate

$$g'(a) = \frac{ax - (1+2ax) \ln(1+ax)}{a^2(1+ax)^2}.$$

It follows from Proposition 2 that  $g'(a) < 0$ . Hence  $g(a)$  is decreasing w.r.t.  $a$  and  $g(\sqrt{2}) < g(1)$ , which is exactly  $\frac{1}{\sqrt{2}} h(x) > 0$ .  $\square$

### A.3. Proof of Lemma 5

*Proof.* It is clear that the base of the logarithm does not matter and we assume that the base is  $e$ . Let  $Z = \sum_i \epsilon_i a_i$  and  $\sigma^2 = \sum a_i^2$ . Then  $\mathbb{E} Z^2 = \sigma^2$  and  $\mathbb{E} |Z| \leq (\mathbb{E} |Z|^2)^{1/2} = \sigma$ . Let  $g(x) = \ln(1+x)$  and

$$Z_1 = \begin{cases} |Z|, & |Z| \geq e-1; \\ 0, & \text{otherwise,} \end{cases} \quad Z_2 = \begin{cases} 0, & |Z| \geq e-1; \\ |Z|, & \text{otherwise.} \end{cases}$$

Then  $|Z| = Z_1 + Z_2$  and

$$\mathbb{E} g(|Z|)^2 = \mathbb{E} (g(Z_1 + Z_2))^2 \leq \mathbb{E} (g(Z_1) + g(Z_2))^2 \leq \mathbb{E} 2(g(Z_1)^2 + g(Z_2)^2),$$

where the first inequality follows from Proposition 3. For the first term, we define  $h(x) = g(x) \cdot \mathbf{1}_{\{x \geq e-1\}}$ . Then  $h(x)^2$  is concave on  $[0, \infty)$ . Hence

$$\mathbb{E} g(Z_1)^2 = \mathbb{E} h(Z_1)^2 = \mathbb{E} h(|Z|)^2 \leq h(\mathbb{E} |Z|)^2 \leq h(\sigma)^2 \leq g(\sigma)^2.$$

Next we upper bound the second term. The first case is  $\sigma \leq e - 1$ . Since  $\mathbb{E} Z^4 \leq 3\sigma^4$ , it holds that  $\Pr\{Z_2 \geq t\sigma\} \leq \Pr\{|Z| \geq t\sigma\} \leq 3/t^4$ . Then

$$\begin{aligned} \mathbb{E} g(Z_2)^2 &\leq \mathbb{E} g(e-1)g(Z_2) \\ &= \mathbb{E} g(Z_2) \\ &= \int_0^{e-1} g(x) \Pr\{Z_2 \geq x\} dx \\ &= \sigma \int_0^{(e-1)/\sigma} g(t\sigma) \Pr\{Z_2 \geq t\sigma\} dt \\ &= \sigma^2 \int_0^{(e-1)/\sigma} g(t) \Pr\{Z_2 \geq t\sigma\} dt \quad (\text{by Proposition 3}) \\ &\leq \sigma^2 \left( \int_0^1 g(t) dt + 3 \int_1^{(e-1)/\sigma} \frac{g(t)}{t^4} dt \right) \\ &\leq C_1 \sigma^2 \\ &\leq C_1 (e-1)^2 g(\sigma)^2, \end{aligned}$$

where  $C_1 > 0$  is an absolute constant and the last inequality follows from the fact that  $g(x) \geq x/(e-1)$  on  $[0, e-1]$ . The second case is  $\sigma > e - 1$ . In this case,

$$\mathbb{E} g(Z_2)^2 \leq 1 \leq g(\sigma)^2.$$

Therefore, we conclude that

$$\mathbb{E} g(|Z|)^2 \leq 2(1 + C_1(e-1)^2)g(\sigma)^2 = C_2 g \left( \sqrt{\sum_i a_i^2} \right)^2 \leq C_2 \sum_i g(|a_i|)^2,$$

where the last inequality follows from Proposition 4. □

#### A.4. Proof of Lemma 6

*Proof.* We first prove the upper bound.

$$\begin{aligned} \|f(y+z)\|_2^2 &= \sum_i f(y_i + z_i)^2 \\ &\leq \sum_i [f(y_i) + f(z_i)]^2 \quad (\text{Proposition 3}) \\ &= \sum_i f(y_i)^2 + \sum_i f(z_i)^2 + \sum_i 2f(y_i)f(z_i) \\ &\leq \sum_i f(y_i)^2 + \xi^2 \sum_i f(y_i)^2 + 2 \sqrt{\sum_i f(y_i)^2} \sqrt{\sum_i f(z_i)^2} \quad (\text{Cauchy-Schwarz}) \\ &\leq (\xi^2 + 2\xi + 1) \|f(y)\|_2^2 \\ &\leq (1 + 3\xi) \|f(y)\|_2^2. \quad (\text{since } \xi < 1) \end{aligned}$$

Next we prove the lower bound. Let  $I = \{i : y_i z_i \leq 0\}$ ,  $J_1 = \{i \in I : |y_i| \leq |z_i|\}$  and  $J_2 = \{i \in I : |z_i| < |y_i| \leq \zeta^{-1}|z_i|\}$  for some  $\zeta < 1$  to be determined. Then

$$\begin{aligned} \|f(y+z)\|_2^2 &= \sum_{i \in J_1} f(y_i + z_i)^2 + \sum_{i \in J_2} f(y_i + z_i)^2 + \sum_{i \in I \setminus (J_1 \cup J_2)} f(y_i + z_i)^2 + \sum_{i \notin I} f(y_i + z_i)^2 \\ &\geq \sum_{i \in I \setminus (J_1 \cup J_2)} f(y_i + z_i)^2 + \sum_{i \notin I} f(y_i)^2. \end{aligned}$$

When  $i \in I \setminus (J_1 \cup J_2)$ , we have  $|z_i| \leq \zeta|y_i|$ . It then follows that

$$\log(|y_i + z_i| + 1) \geq \log((1 - \zeta)|y_i| + 1) \geq (1 - \zeta) \log(|y_i| + 1),$$

where, for the last inequality, one can easily verify that  $h_\epsilon(x) = \frac{\log(1+(1-\epsilon)x)}{\log(1+x)}$  is increasing on  $[0, \infty)$  and  $\lim_{x \rightarrow 0^+} h_\epsilon(x) = 1 - \epsilon$ . Hence

$$\sum_i f(y_i + z_i)^2 \geq (1 - \zeta)^2 \sum_{i \in I \setminus (J_1 \cup J_2)} f(y_i)^2 + \sum_{i \notin I} f(y_i)^2 \geq (1 - \zeta)^2 \sum_{i \notin J_1 \cup J_2} f(y_i)^2.$$

Now, note that

$$\sum_{i \in J_1} f(y_i)^2 \leq \sum_{i \in J_1} f(z_i)^2 \leq \|f(z)\|_2^2 \leq \xi^2 \|f(y)\|_2^2$$

and (using Proposition 3)

$$\sum_{i \in J_2} f(y_i)^2 \leq \zeta^{-2} \sum_{i \in J_2} f(z_i)^2 \leq \zeta^{-2} \|f(z)\|_2^2 \leq (\zeta^{-1} \xi)^2 \|f(y)\|_2^2.$$

It follows that

$$\begin{aligned} \sum_i f(y_i + z_i)^2 &\geq (1 - \zeta)^2 \left( \|f(y)\|_2^2 - \xi^2 \|f(y)\|_2^2 - (\zeta^{-1} \xi)^2 \|f(y)\|_2^2 \right) \\ &= (1 - \zeta)^2 (1 - \xi^2 - (\zeta^{-1} \xi)^2) \|f(y)\|_2^2. \end{aligned}$$

Choosing  $\zeta = (\xi^2/(1 - \xi^2))^{1/3}$  maximizes the right-hand side, yielding

$$\|f(y+z)\|_2^2 \geq (1 - 3\xi^{2/3}) \|f(y)\|_2^2. \quad \square$$

## B. Omitted Proofs from Section 3.1

### B.1. Proof of Lemma 7

*Proof.* Note that  $|I_{\alpha\phi}| \leq 1/(\alpha\phi)$ . Thus, there exists a collision with probability at most

$$\frac{1}{w} \binom{1/(\alpha\phi)}{2} \leq \frac{1}{2w\alpha^2\phi^2} \leq 0.1,$$

provided that  $w \geq 1/(0.2 \cdot \alpha^2\phi^2) = 5/(\alpha^2\phi^2)$ . □

### B.2. Proof of Lemma 8

*Proof.* Let  $v = h(u)$ . Since  $h$  is pairwise independent,  $\Pr\{h(i) = v\} = 1/w$  for all  $i \neq u$ . Let

$$Z_v = \sum_{i \notin (I_{\alpha\phi} \cup \{u\})} \mathbf{1}_{\{h(i)=v\}} \|f(A_i)\|_2^2.$$

then

$$\mathbb{E} Z_v \leq \sum_{i \notin I_{\alpha\phi}} \mathbb{E} \mathbf{1}_{\{h(i)=v\}} \|f(A_i)\|_2^2 \leq \frac{M}{w}.$$

It follows from Lemma 5 that

$$\begin{aligned} \mathbb{E}_{\{\epsilon_i\}, h} \left\| f \left( \sum_{i \notin I_{\alpha\phi}} \mathbf{1}_{\{h(i)=v\}} \epsilon_i A_i \right) \right\|_2^2 &\leq \mathbb{E}_h C \sum_{i \notin I_{\alpha\phi}} \|f(\mathbf{1}_{\{h(i)=v\}} A_i)\|_2^2 \\ &= C \mathbb{E}_h Z_v \\ &\leq C \frac{M}{w}, \end{aligned}$$

where we used the fact that  $f(0) = 0$  and  $\mathbf{1}_{\{h(i)=v\}} \in \{0, 1\}$  in the second step (the equality). The result follows from Markov's inequality.  $\square$

### B.3. Obtaining an Overestimate $\widehat{M}$

In this subsection we verify that  $g(x) = \ln^2(1 + \eta x)$  is slow-jumping, slow-dropping, and predictable, where the three properties are defined in (Braverman et al., 2016).

To show that  $g$  is slow-jumping, we shall verify that for any  $\alpha > 0$ ,  $g(y) \leq \lfloor \frac{y}{x} \rfloor^{2+\alpha} x^\alpha g(x)$  for all  $x < y$ , whenever  $y$  is sufficiently large. (i) When  $x \geq y/2$ , it suffices to show that  $g(y) \leq x^\alpha g(x)$ . Since  $g(x)$  is increasing, it reduces to showing  $g(y) \leq (y/2)^\alpha g(y/2)$ . This clearly holds for all large  $y$  because one can easily check that  $\ln(1+y) \leq 2 \ln(1+\frac{y}{2})$  when  $y > 0$ . (ii) When  $x < y/2$ , we shall show that  $g(y) \leq (\frac{y}{x} - 1)^{2+\alpha} x^\alpha g(x)$ , i.e.,  $g(y) \leq (\frac{y-x}{x})^2 (y-x)^\alpha g(x)$ . Since  $x < y/2$ , we have  $y-x \geq y/2$  and thus it suffices to show that  $g(y) \leq \frac{1}{4} (\frac{y}{x})^2 (\frac{y}{2})^\alpha g(x)$ , and for large  $y$  that  $\frac{g(y)}{y^2} \leq \frac{g(x)}{x^2}$ , which can be easily verified. This concludes the proof that  $g$  is slow-jumping.

To show that  $g$  is slow-dropping, we shall verify that for any  $\alpha > 0$  it holds that  $g(y) \geq g(x)/x^\alpha$  for all  $x < y$  whenever  $y$  is sufficiently large. This holds obviously because  $g(x)$  is increasing.

To show that  $g$  is predictable, we shall verify that for any  $\gamma \in (0, 1)$  and subpolynomial  $\epsilon(x)$ , it holds that  $g(y) \geq x^{-\gamma} g(x)$  for all sufficiently large  $x$  and all  $y \in [1, x^{1-\gamma}]$  such that  $g(x+y) > (1 + \epsilon(x))g(x)$ . This holds automatically because  $g(2x)/g(x) \rightarrow 1$  as  $x \rightarrow \infty$  and thus for any given  $\epsilon(x)$ , when  $x$  is sufficiently large, it would not hold that  $g(x+y) > (1 + \epsilon(x))g(x)$  for  $y \in [1, x]$ .

## C. Omitted Proofs from Section 3.2

### C.1. Proof of Theorem 12

*Proof.* For notational convenience, let  $G = f(A)$ . Let  $S$  be a random sample of  $s$  rows chosen from a distribution that satisfies (1). We can write the  $i$ -th sample as  $G_i + E_i$  for some error vector  $E_i$ . Consider the singular value decomposition of  $G = \sum_t \sigma_t u_t v_t^\top$ .

For each  $t$ , we define a random vector

$$w_t = \frac{1}{s} \sum_{i \in S} \frac{(u_t)_i}{p_i} (G_i + E_i).$$

Note that  $S$  in general consists of sampled columns of  $f(A)$  with noise. The vectors  $w_t$  are clearly in the subspace generated by  $S$ . We first compute  $\mathbb{E} w_t$ . We can view  $w_t$  as the average of  $s$  i.i.d. random variables  $X_1, \dots, X_s$ , where each  $X_j$  has the following distribution:

$$X_j = \frac{(u_t)_i}{p_i} (G_i + E_i) \text{ with probability } p_i, \quad i = 1, 2, \dots, n.$$

Taking expectations,

$$\mathbb{E} X_j = \sum_{i=1}^n \frac{(u_t)_i}{p_i} (G_i + E_i) p_i = u_t^\top (G + E) = \sigma_t v_t^\top + u_t^\top E$$

Hence

$$\mathbb{E} w_t = \mathbb{E} X_j = \sigma_t v_t^\top + u_t^\top E$$

and

$$\|\mathbb{E} X_j\|_2^2 = \sigma_t^2 + 2\langle \sigma_t v_t^\top, u_t^\top E \rangle + \|u_t^\top E\|_2^2 \leq \sigma_t^2 + 2\langle \sigma_t v_t^\top, u_t^\top E \rangle + \|E\|_2^2.$$

We also calculate that

$$\begin{aligned} \mathbb{E} \|X_j\|_2^2 &= \sum_i \frac{(u_t)_i^2}{p_i^2} \|G_i + E_i\|_2^2 \cdot p_i \\ &\leq \sum_i \frac{(u_t)_i^2}{p_i} (\|G_i\|_2 + \|E_i\|_2)^2 \\ &\leq \sum_i (u_t)_i^2 \frac{\|G\|_F^2}{c \|G_i\|_2^2} (1 + \gamma)^2 \|G_i\|_2^2 \\ &= \frac{(1 + \gamma)^2}{c} \|G\|_F^2, \end{aligned}$$

where we used the assumption (1) in the third line and the fact that  $\|u_t\|_2 = 1$  in the last line. It follows that

$$\begin{aligned} \mathbb{E} \|w_t\|_2^2 &= \mathbb{E} \left\| \frac{1}{s} \sum_j X_j \right\|_2^2 = \frac{1}{s} \sum_j \mathbb{E} \|X_j\|_2^2 + \frac{1}{s^2} \sum_{j \neq \ell} \langle \mathbb{E} X_j, \mathbb{E} X_\ell \rangle \\ &\leq \frac{(1 + \gamma)^2}{sc} \|G\|_F^2 + \frac{s(s-1)}{s^2} \left( \sigma_t^2 + 2\langle \sigma_t v_t^\top, u_t^\top E \rangle + \|E\|_2^2 \right), \end{aligned}$$

and thus

$$\begin{aligned} \mathbb{E} \|w_t - \sigma_t v_t^\top\|_2^2 &= \mathbb{E} \|w_t\|_2^2 - 2\langle \mathbb{E} w_t, \sigma_t v_t^\top \rangle + \sigma_t^2 \\ &\leq \frac{(1 + \gamma)^2}{sc} \|G\|_F^2 + \sigma_t^2 + 2\langle \sigma_t v_t^\top, u_t^\top E \rangle + \|E\|_2^2 - 2\sigma_t^2 - 2\langle u_t^\top E, \sigma_t v_t^\top \rangle + \sigma_t^2 \\ &= \frac{(1 + \gamma)^2}{sc} \|G\|_F^2. \end{aligned} \quad (2)$$

If  $w_t$  were exactly equal to  $\sigma_t v_t^\top$  (instead of just in expectation), we would have

$$G \sum_{t=1}^k v_t v_t^\top = G \sum_{t=1}^k w_t^\top w_t,$$

which would be sufficient to prove the theorem. We wish to carry this out approximately. To this end, define  $\hat{y}_t = \frac{1}{\sigma_t} w_t^\top$  for  $t = 1, 2, \dots, s$  and let  $V_1 = \text{span}(\hat{y}_1, \hat{y}_2, \dots, \hat{y}_s) \subseteq V$ . Let  $y_1, y_2, \dots, y_l$  be an orthonormal basis of  $\mathbb{R}^n$  with  $V_1 = \text{span}(y_1, y_2, \dots, y_l)$ , where  $l = \dim(V_1)$ . Let

$$B = \sum_{t=1}^l G y_t y_t^\top \quad \text{and} \quad \hat{B} = \sum_{t=1}^k G v_t \hat{y}_t^\top.$$

The matrix  $B$  will be our candidate approximation to  $G$  in the span of  $S$ . We shall bound its error using  $\hat{B}$ . Note that for any  $i \leq k$  and  $j > l$ , we have  $(\hat{y}_i)^\top y_j = 0$ . Thus,

$$\|G - B\|_F^2 = \sum_{i=1}^n \left\| (G - B)y^{(i)} \right\|_2^2 = \sum_{i=l+1}^n \left\| G y^{(i)} \right\|_2^2 = \sum_{i=l+1}^n \left\| (G - \hat{B})y^{(i)} \right\|_2^2 \leq \|G - \hat{B}\|_F^2. \quad (3)$$

Also,

$$\|G - \hat{B}\|_F^2 = \sum_{i=1}^n \left\| u_i^\top (G - \hat{B}) \right\|_2^2 = \sum_{i=1}^k \left\| \sigma_i v_i^\top - w_i \right\|_2^2 + \sum_{i=k+1}^n \sigma_i^2$$

Taking expectations and using (2), we obtain that

$$\mathbb{E} \left\| G - \hat{B} \right\|_F^2 \leq \sum_{i=k+1}^n \sigma_i^2 + \frac{k(1+\gamma)^2}{sc} \|G\|_F^2. \quad (4)$$

Note that  $\hat{B}$  is of rank at most  $k$  and  $D_k$  is the best rank- $k$  approximation to  $G$ . We have

$$\left\| G - \hat{B} \right\|_F^2 \geq \left\| G - D_k \right\|_F^2 = \sum_{i=k+1}^n \sigma_i^2$$

Thus  $\|G - \hat{B}\|_F^2 - \|G - D_k\|_F^2$  is a non-negative random variable. It follows from (4) that

$$\Pr \left\{ \left\| G - \hat{B} \right\|_F^2 - \left\| G - D_k \right\|_F^2 \geq \frac{10k(1+\gamma)^2}{sc} \|G\|_F^2 \right\} \leq \frac{1}{10}.$$

The result follows from (3) and the fact that  $\|E\|_F^2 \leq \gamma \|G\|_F^2$ .  $\square$

## C.2. Proof of Corollary 13

*Proof.* First, it follows from a Chernoff bound and a union bound that we can guarantee with probability at least 0.9 that all samples have the form  $f(A_i) + E_i$  with small  $\|E_i\|_2$ . Then, it follows from another Chernoff bound that with probability at least 0.9, it holds that there are  $s/2$  samples from  $A'$ . We apply Theorem 12 to  $A'$  and  $s/2$  and obtain that

$$\left\| f(A') - f(A') \sum_j y_j y_j^\top \right\|_F^2 \leq \min_{D: \text{rank}(D) \leq k} \|f(A') - D\|_F^2 + \frac{30k}{sc} \|f(A')\|_F^2.$$

Suppose that  $A''$  is the submatrix of  $A$  which consists of the rows of  $A$  that are not in  $A'$ . Then  $f(A)$  is the (interlacing) concatenation of  $f(A')$  and  $f(A'')$ . Since  $\|f(A'')\|_F^2 \leq \epsilon \|f(A)\|_F^2$  and  $y_1, \dots, y_k$  remains valid if we add more samples,

$$\begin{aligned} & \left\| f(A) - f(A) \sum_j y_j y_j^\top \right\|_F^2 \\ &= \left\| f(A') - f(A') \sum_j y_j y_j^\top \right\|_F^2 + \left\| f(A'') - f(A'') \sum_j y_j y_j^\top \right\|_F^2 \\ &\leq \min_{D: \text{rank}(D) \leq k} \|f(A') - D\|_F^2 + \frac{30k}{sc} \|f(A)\|_F^2 + \|f(A'')\|_F^2 \\ &\leq \min_{D: \text{rank}(D) \leq k} \|f(A) - D\|_F^2 + \left( \frac{30k}{sc} + \epsilon \right) \|f(A)\|_F^2. \end{aligned}$$

The overall failure probability combines that of Theorem 10, Theorem 12 and the events at the beginning of this proof.

For the second result, take  $s = O(k/\epsilon)$  and rescale  $\epsilon$ .  $\square$

## D. Proof of Theorem 16

By Theorem 10, for every  $i \in [s]$ , there exists  $j(i)$  such that  $h_i = (f(A)_{j(i)}, b_{j(i)}) + F_{j(i)}$ , where  $F_i = \frac{E_i}{\sqrt{sp_i}}$ . We define a new matrix  $S$  such that in the  $i$ -th row of  $S$ ,  $S_{i,j(i)} = \frac{1}{\sqrt{sp_{j(i)}}}$  and the other entries are zero. By Theorem 15, we have that the row-sampling probability we use is a  $(1 \pm O(\epsilon))$  approximation to the true sampling probability. Therefore, we define matrix  $\hat{S}$  such that in the  $i$ -th row of  $\hat{S}$ ,  $\hat{S}_{i,j(i)} = \frac{1}{\sqrt{sp_{j(i)}}}$  and the other entries are zero, and matrix  $\hat{F}$  is such that  $\hat{F}_i = \frac{E_i}{\sqrt{sp_i}}$ . Then, we find that  $\hat{S}(f(A) \ b) + \hat{F} = T$ .

*Proof.* For notational convenience, we let  $G = f(A)$  with singular value decomposition  $G = U\Sigma V^\top$ . We shall show that  $\|I_d - (\hat{S}U)^\top(\hat{S}U)\|_2$  is small, for which we first show  $\|I_d - (SU)^\top(SU)\|_2$  is small.

Let  $X_i = I_d - Y_i^\top Y_i$  and  $Y_i = \frac{U_{j(i)}}{\sqrt{p_{j(i)}}}$ , where  $U_t$  is the  $t$ -th row of  $U$ , which means that the  $j(i)$ -th row of  $M$  is chosen in the  $i$ -th trial. Since

$$\mathbb{E}(X_i) = I_d - \mathbb{E}(Y_i^\top Y_i) = I_d - \sum_{t=1}^n p_t \frac{U_t^\top}{\sqrt{p_t}} \frac{U_t}{\sqrt{p_t}} = I_d - \sum_{t=1}^n U_t^\top U_t = 0,$$

we can apply Lemma 1 to  $X_1, \dots, X_s$ , for which we need to upper bound  $\|X_i\|_2$  and  $\|\mathbb{E}(X_i^2)\|_2$ .

We first bound  $\|X_i\|_2$ .

$$\|X_i\|_2 = \|I_d - Y_i^\top Y_i\|_2 \leq 1 + \frac{\|U_i^\top U_i\|_2}{p_i} \leq 1 + \frac{\|U_i\|_2^2}{c \|G_i\|_2^2} \|G\|_F^2 \leq 1 + \frac{\sigma_1^2 + \dots + \sigma_d^2}{c \sigma_d^2} \leq 1 + \frac{d\kappa^2}{c},$$

where  $\sigma_1 \geq \dots \geq \sigma_d$  are the singular values of  $G$ , and in the penultimate inequality we use the fact that  $\|G_i\|_2 = \|U_i \Sigma V^\top\|_2 = \|U_i \Sigma\|_2 \geq \sigma_d \|U_i\|_2$ .

Next, we bound  $\|\mathbb{E}(X_i^2)\|_2$ . Observe that

$$\begin{aligned} \mathbb{E}(X_i^2 + I_d) &= I_d + \mathbb{E}(I_d - Y_i^\top Y_i)(I_d - Y_i^\top Y_i) = I_d + \mathbb{E}(I_d - 2Y_i^\top Y_i + Y_i^\top Y_i Y_i^\top Y_i) \\ &= 2I_d - \mathbb{E}(Y_i^\top Y_i) + \mathbb{E}(Y_i^\top Y_i \|Y_i\|_2^2) = \mathbb{E}\left(\frac{\|U_{j(i)}\|_2^2}{p_{j(i)}} Y_i^\top Y_i\right), \end{aligned}$$

and thus

$$\|\mathbb{E}(X_i^2 + I_d)\|_2 = \left\| \mathbb{E}\left(\frac{\|U_{j(i)}\|_2^2}{p_{j(i)}} Y_i^\top Y_i\right) \right\|_2 \leq \left\| \mathbb{E}\left(\frac{\|U_i\|_2^2}{c \|G_i\|_2^2} \|G\|_F^2 Y_i^\top Y_i\right) \right\|_2 \leq \left\| \mathbb{E}\left(\frac{d\kappa^2}{c} Y_i^\top Y_i\right) \right\|_2 = \frac{d\kappa^2}{c}.$$

It follows immediately from the triangle inequality that

$$\|\mathbb{E} X_i^2\|_2 \leq \|\mathbb{E}(X_i^2 + I_d)\|_2 + \|I_d\|_2 \leq \frac{d\kappa^2}{c} + 1.$$

Invoking Lemma 1, for

$$W = \frac{1}{s} \sum_{i=1}^s X_i = I_d - \frac{1}{s} \sum_{i=1}^s Y_i^\top Y_i = I_d - (SU)^\top(SU),$$

and  $\rho = \sigma^2 = 1 + d\kappa^2/c$ , we have that

$$\Pr\{\|I_d - (SU)^\top(SU)\|_2 > \epsilon\} \leq 2d \exp\left(-\frac{\epsilon^2 s}{\sigma^2 + \rho\epsilon/3}\right) \leq 2d \exp\left(-\frac{\epsilon^2 s}{2d\kappa^2/c}\right) \leq \delta$$

by our choice of  $s$ . Equivalently, with probability at least  $1 - \delta$ , it holds that  $\|I_d - (SU)^\top(SU)\|_2 \leq \epsilon$ , which implies that  $\|SGx\|_2 = (1 \pm \epsilon) \|Gx\|_2$  for all  $x \in \mathbb{R}^d$ . We condition on this event in the rest of the proof.

Second, we show that the error between  $\|I_d - (SU)^\top(SU)\|_2$  and  $\|I_d - (\hat{S}U)^\top(\hat{S}U)\|_2$  is small.

$$\begin{aligned} \|I_d - (\hat{S}U)^\top(\hat{S}U)\|_2 &\leq \|I_d - (SU)^\top(SU)\|_2 + \|(\hat{S}U)^\top(\hat{S}U) - (SU)^\top(SU)\|_2 \\ &\leq \epsilon + \|(\hat{S}U)^\top(\hat{S}U) - (SU)^\top(SU)\|_2. \end{aligned}$$

Observe that  $(\hat{S}U)^\top(\hat{S}U) = \sum_{i=1}^s \frac{U_{j(i)}^\top U_{j(i)}}{s \hat{p}_{j(i)}} = \sum_{i=1}^s \frac{U_{j(i)}^\top U_{j(i)}}{(1 \pm O(\epsilon)) s p_{j(i)}} = \frac{(SU)^\top(SU)}{1 \pm O(\epsilon)}$  and thus

$$\|(\hat{S}U)^\top(\hat{S}U) - (SU)^\top(SU)\|_2 = O(\epsilon) \|(SU)^\top(SU)\|_2.$$

We have proved that  $\|I_d - (SU)^\top(SU)\|_2 \leq \epsilon$ , so we have  $\|I_d - (\hat{S}U)^\top(\hat{S}U)\|_2 \leq \epsilon + O(\epsilon)(1 + \epsilon) = O(\epsilon)$ . By rescaling  $\epsilon'$ , we can assume that  $\|I_d - (\hat{S}U)^\top(\hat{S}U)\|_2 \leq \epsilon$ .

Now consider the subspace spanned by the columns of  $M$  together with  $b$ . For any vector  $y = Gx - b$ ,  $\|\hat{S}y\|_2 = (1 \pm \epsilon) \|y\|_2$ . Recall that we have defined  $\hat{F}_i = \frac{E_i}{\sqrt{s\hat{p}_i}}$ , where  $\hat{F}_i$  and  $E_i$  are the corresponding  $i$ -th row of  $F$  and  $E$ . Let  $\hat{F}^{(1)}$  be the first  $d$  columns of  $\hat{F}$  and  $\hat{F}^{(2)}$  be the last column of  $\hat{F}$ . Hence, the original linear regression problem can be written as  $\min_x \|(\hat{S}G + \hat{F}^{(1)})x - (\hat{S}b + \hat{F}^{(2)})\|_2$ .

Note that  $\tilde{x} = \arg \min_x \|(\hat{S}G + \hat{F}^{(1)})x - (\hat{S}b + \hat{F}^{(2)})\|_2$  satisfies

$$\begin{aligned} \min_{\tilde{x}} \|(\hat{S}G + \hat{F}^{(1)})\tilde{x} - (\hat{S}b + \hat{F}^{(2)})\|_2 &\leq \|(\hat{S}G + \hat{F}^{(1)})x^* - (\hat{S}b + \hat{F}^{(2)})\|_2 \\ &\leq \|\hat{S}(Gx^* - b)\|_2 + \|\hat{F}^{(1)}x^* - \hat{F}^{(2)}\|_2 \\ &\leq (1 + \epsilon) \|Gx^* - b\|_2 + \|\hat{F}\|_2 \sqrt{\|x^*\|_2^2 + 1}, \end{aligned}$$

where the third inequality holds because  $\hat{S}$  is a subspace embedding for the column space of  $G$  together with  $b$  and  $x^* = \arg \min_{x \in \mathbb{R}^d} \|Gx - b\|_2$ .

Now, consider the upper bound on  $\|\hat{F}\|_2$ . Since

$$\|\hat{F}_i\|_2^2 = \frac{\|E_i\|_2^2}{s\hat{p}_i} \leq \gamma^2 \frac{\|G_i\|_2^2 + |b_i|^2}{sc(\|G_i\|_2^2 + |b_i|^2)} (\|G\|_F^2 + \|b\|_2^2) \leq \frac{\gamma^2}{sc} (\|G\|_F^2 + \|b\|_2^2)$$

and

$$\|x^*\|_2 = \|G^\dagger b\|_2 \leq \frac{\|b\|_2}{\sigma_{\min}(G)},$$

we have that

$$\begin{aligned} \min_{\tilde{x}} \|(\hat{S}G + \hat{F}^{(1)})\tilde{x} - (\hat{S}b + \hat{F}^{(2)})\|_2 &\leq (1 + \epsilon) \|Gx^* - b\|_2 + \|\hat{F}\|_2 \sqrt{\|x^*\|_2^2 + 1} \\ &\leq (1 + \epsilon) \|Gx^* - b\|_2 + \frac{\gamma}{\sqrt{c}} \sqrt{\|G\|_F^2 + \|b\|_2^2} \cdot \sqrt{\frac{\|b\|_2^2}{\sigma_{\min}^2(G)} + 1} \\ &\leq (1 + \epsilon) \|Gx^* - b\|_2 + \frac{\gamma}{\sqrt{c}} \left( \sqrt{\|G\|_F^2 + \|b\|_2^2} + \sqrt{d + \frac{\|b\|_2^2}{\|G\|_2^2} \kappa \|b\|_2} \right). \end{aligned}$$

By our assumption,  $c = 1 - O(\epsilon)$  and  $\gamma = O(\epsilon)$ . Rescaling  $\epsilon$  gives the claimed bound, completing the proof of Theorem 16.  $\square$
